# Supplementary material
Source: MDPI journal article supplement (https://www.mdpi.com/2072-4292/15/6/1704)
Supplement: s1 [file s1]

## Supplementary files

**Table S1.** Statistical data of the descending dataset. The tables report the statistics of the SAR-GNSS residuals (mean, median, standard deviation, and correlation coefficient) of the 16 tests obtained after calibration. The combinations are based on the Goldstein filter window size (32x32 and 64x64 pixels), the search radius used for calibration (200,400,600 and 800 meters), and the calibration error model (linear and quadratic). The values in red refer to the best calibrated test.

| Descending Datasets |          |                  |       |        |                       |                            |
|---------------------|----------|------------------|-------|--------|-----------------------|----------------------------|
|                     | Tests    | Number<br>of PSs | Mean  | Median | Standard<br>Deviation | Correlation<br>Coefficient |
| Linear              | 32-L-200 | 50               | 0     | 0.02   | 0.64                  | 0.77                       |
|                     | 32-L-400 | 51               | 0     | 0.04   | 0.65                  | 0.77                       |
|                     | 32-L-600 | 51               | 0     | 0.13   | 0.64                  | 0.77                       |
|                     | 32-L-800 | 51               | -0.01 | 0.13   | 0.64                  | 0.77                       |
|                     | 64-L-200 | 50               | 0     | 0.06   | 0.6                   | 0.8                        |
|                     | 64-L-400 | 51               | 0     | 0.09   | 0.63                  | 0.79                       |
|                     | 64-L-600 | 51               | 0     | 0.12   | 0.59                  | 0.8                        |
|                     | 64-L-800 | 51               | 0     | 0.11   | 0.6                   | 0.8                        |
| Quadratic           | 32-Q-200 | 50               | 0.36  | 0.46   | 0.59                  | 0.82                       |
|                     | 32-Q-400 | 51               | 0.38  | 0.47   | 0.60                  | 0.82                       |
|                     | 32-Q-600 | 51               | 0.36  | 0.46   | 0.58                  | 0.83                       |
|                     | 32-Q-800 | 51               | 0.35  | 0.46   | 0.58                  | 0.83                       |
|                     | 64-Q-200 | 50               | 0.26  | 0.35   | 0.58                  | 0.83                       |
|                     | 64-Q-400 | 51               | 0.27  | 0.38   | 0.59                  | 0.82                       |
|                     | 64-Q-600 | 51               | 0.25  | 0.36   | 0.56                  | 0.83                       |
|                     | 64-Q-800 | 51               | 0.23  | 0.39   | 0.56                  | 0.83                       |

**Table S2.** Statistical data of the ascending dataset. The tables report the statistics of the SAR-GNSS residuals (mean, median, standard deviation, and correlation coefficient) of the 16 tests obtained after calibration. The combinations are based on the Goldstein filter window size (32x32 and 64x64 pixels), the search radius used for calibration (200,400,600 and 800 meters), and the calibration error model (linear and quadratic). The values in red refer to the best calibrated test.

| Ascending Datasets |          |               |       |        |                    |                         |
|--------------------|----------|---------------|-------|--------|--------------------|-------------------------|
|                    | Tests    | Number of PSs | Mean  | Median | Standard Deviation | Correlation Coefficient |
| Linear             | 32-L-200 | 52            | 0     | 0.13   | 0.82               | 0.53                    |
|                    | 32-L-400 | 52            | 0     | 0.02   | 0.79               | 0.53                    |
|                    | 32-L-600 | 52            | -0.01 | 0.07   | 0.79               | 0.51                    |
|                    | 32-L-800 | 52            | 0     | 0.10   | 0.8                | 0.49                    |
|                    | 64-L-200 | 52            | 0     | 0.11   | 0.8                | 0.54                    |
|                    | 64-L-400 | 52            | 0     | 0.01   | 0.78               | 0.54                    |
|                    | 64-L-600 | 52            | 0     | 0.06   | 0.78               | 0.53                    |
|                    | 64-L-800 | 52            | 0     | 0.05   | 0.78               | 0.51                    |
| Quadratic          | 32-Q-200 | 52            | 0.23  | 0.18   | 0.72               | 0.68                    |
|                    | 32-Q-400 | 52            | 0.2   | 0.11   | 0.69               | 0.68                    |
|                    | 32-Q-600 | 52            | 0.24  | 0.19   | 0.68               | 0.68                    |
|                    | 32-Q-800 | 52            | 0.23  | 0.19   | 0.68               | 0.67                    |
|                    | 64-Q-200 | 52            | 0.1   | 0      | 0.72               | 0.67                    |
|                    | 64-Q-400 | 52            | 0.1   | 0.03   | 0.69               | 0.67                    |
|                    | 64-Q-600 | 52            | 0.12  | 0.08   | 0.68               | 0.67                    |
|                    | 64-Q-800 | 52            | 0.12  | 0.06   | 0.68               | 0.66                    |

**Table S3.** Statistics of InSAR-GNSS velocities for the vertical and east-west components. The table reports the statistics of the SAR-GNSS residuals (mean, median, standard deviation, and correlation coefficient) for the east-west and vertical velocity components.

|           | Number of GNSS | Mean | Median | Standard Deviation | Correlation Coefficient |
|-----------|----------------|------|--------|--------------------|-------------------------|
| East-west | 43             | 0.10 | 0.19   | 0.62               | 0.55                    |
| Vertical  | 43             | 0.27 | 0.28   | 0.61               | 0.8                     |

**Table S4.** Standard Deviation values (mm/yr) of the LOS calibrated velocities. The table reports the statistics (minimum, maximum, mean, and median values) for the ascending and descending datasets.

|            | Min    | Max    | Mean   | Median |
|------------|--------|--------|--------|--------|
| Ascending  | 0.0317 | 1.3441 | 0.2128 | 0.2080 |
| Descending | 0.0287 | 1.2634 | 0.2167 | 0.2033 |

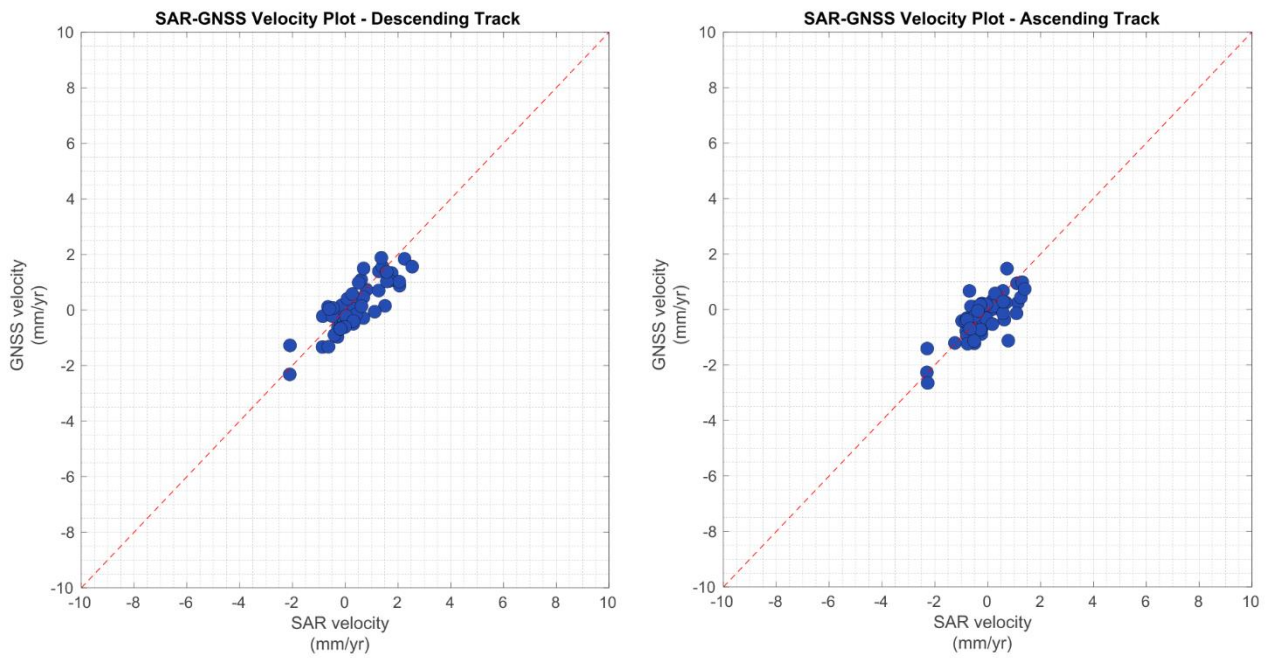

**Figure S1.** InSAR-GNSS LOS velocity plots. The plots show the correlation between geodetic measurements after the calibration for both orbit tracks. The best calibrated LOS datasets are those based on a quadratic calibration error model, a search radius of 600 meters around each GNSS station, and a Goldstein filter window size of 64.

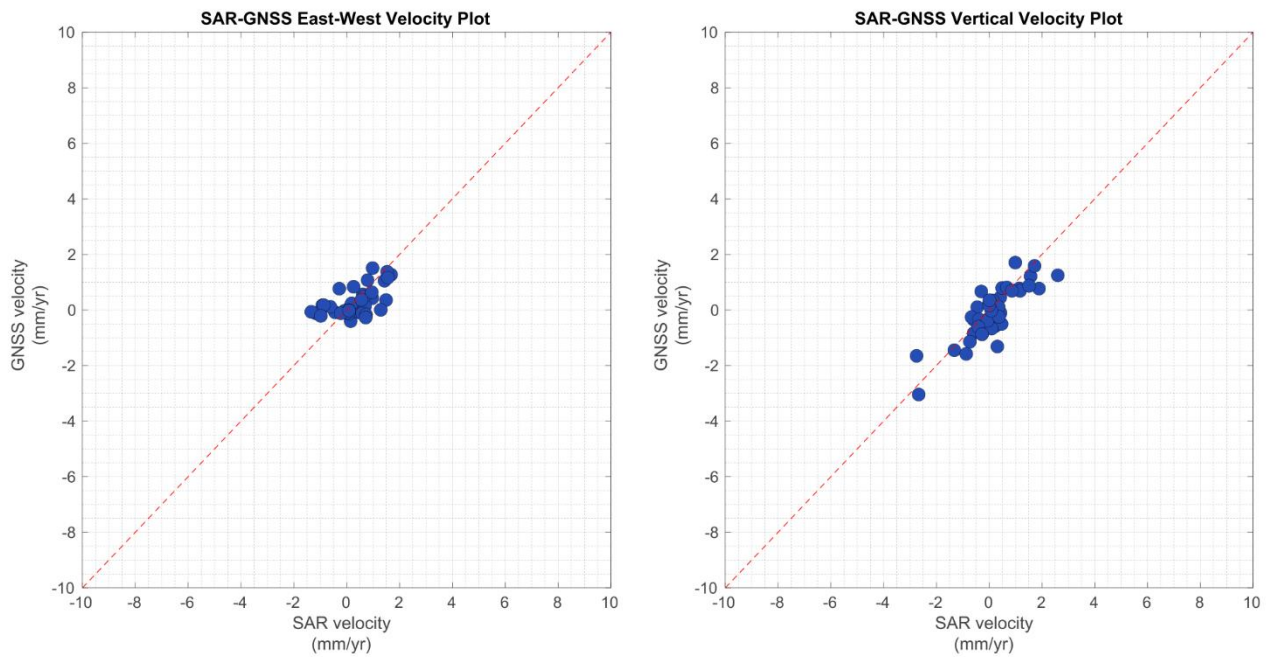

**Figure S2.** InSAR-GNSS east-west and vertical velocity plots. The plots show the correlation between geodetic data for the east-west and vertical components.

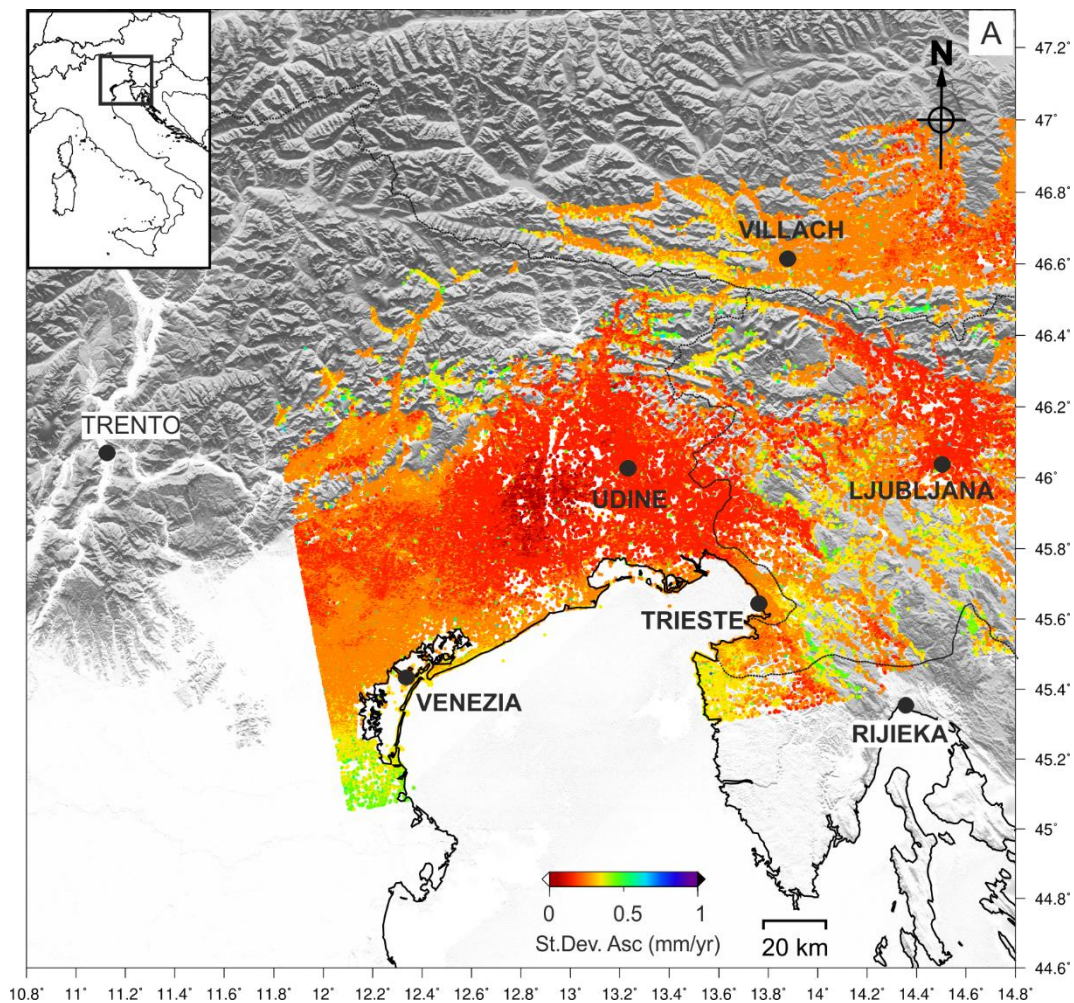



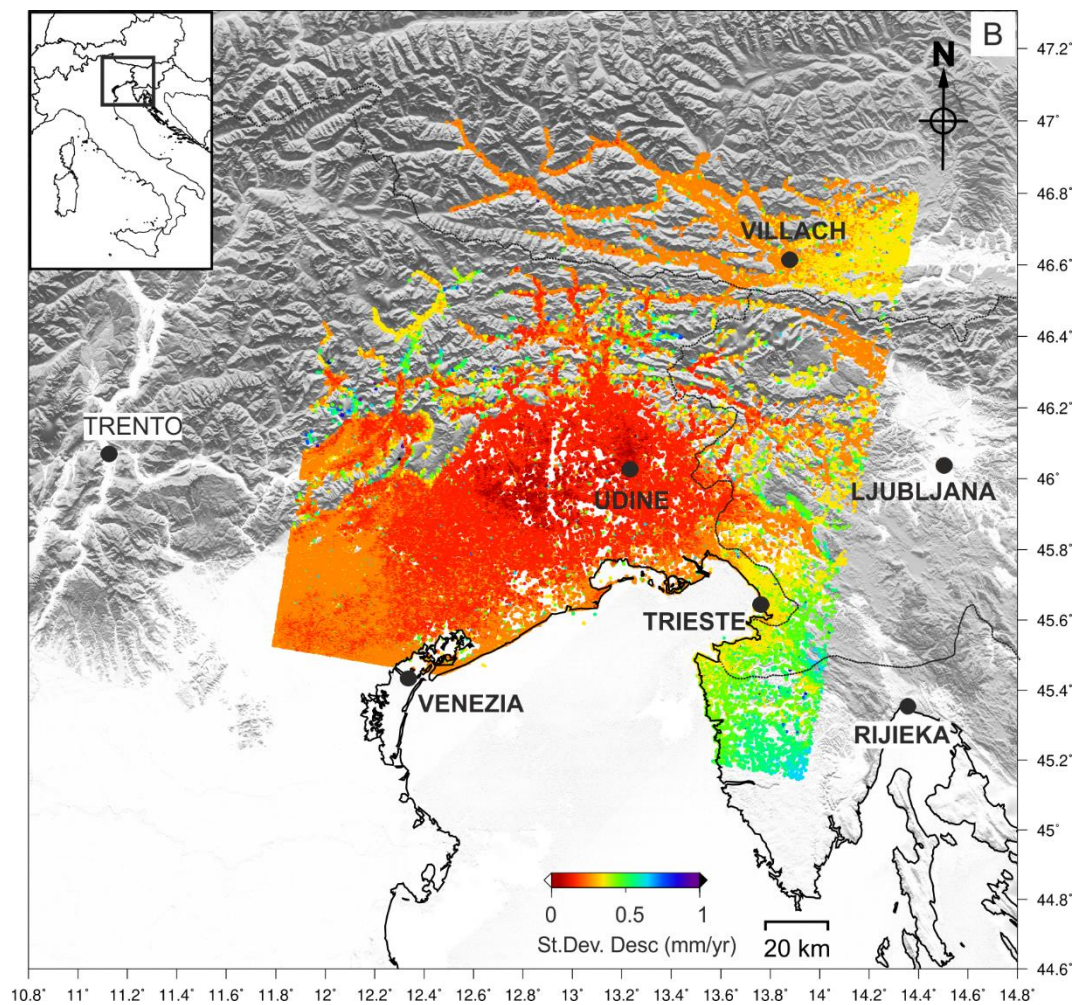

**Figure S3.** Standard Deviation maps of the LOS calibrated velocities for the ascending (A) and descending (B) datasets.
